# Supplementary material for: Molecular engineering of a dual emission near-infrared ratiometric fluorophore for the detection of pH at the organism level
Source: Royal Society of Chemistry journal article supplement (doi:10.1039/c5an00551e), 2015-01-01
Supplement: c5an00551e1.pdf [file c5an00551e1.pdf]

## Supporting Information

### Molecular engineering of a dual emission near-infrared ratiometric fluorophore for detection of pH at the organism level

Bo-Lin Wang,<sup>a</sup> Chuang Jiang,<sup>a</sup> Kun Li,<sup>a,b</sup> Yan-Hong Liu,<sup>a</sup> Yongmei Xie<sup>b</sup> and Xiao-Qi Yu<sup>\*a</sup>

<sup>a</sup> Key Laboratory of Green Chemistry and Technology, Ministry of Education, College of Chemistry, Sichuan University, Chengdu, 610064, P. R. China. E-mail: kli@scu.edu.cn, xqyu@scu.edu.cn; Fax: +86-28-85415886

<sup>b</sup> State Key Laboratory of Biotherapy, West China Hospital, West China Medical School, Sichuan University,

Chengdu 610041, China

### Contents:

|                                                                                                   |       |
|---------------------------------------------------------------------------------------------------|-------|
| Figure S1 Absorption and fluorescence spectra of <b>NIR-HBT</b>                                   | S2    |
| Figure S2 Spectra of <b>NIR-HBT</b> with different pH with excitation at 638 nm                   | S2    |
| Figure S3 Plots of $I_{764}/I_{713}$ and $I_{713}/I_{764}$ versus pH values                       | S2    |
| Figure S4 Effect of various substances on the fluorescence response of <b>NIR-HBT</b>             | S3    |
| Figure S5 Time-dependent fluorescence intensity change of <b>NIR-HBT</b>                          | S3    |
| Figure S6 Cytotoxicity of <b>NIR-HBT</b> evaluated on HepG-2 cells by CCK-8 assay                 | S3    |
| Figure S7. Confocal images of HepG-2 cells stained with <b>NIR-HBT</b>                            | S4    |
| Figure S8. Photophysical properties of <b>NIR-HBT</b> by the scanning lambda ( $xy\lambda$ ) mode | S4    |
| Figure S9. Flow cytometry analysis of HepG-2 cells stained with <b>NIR-HBT</b>                    | S5    |
| Figure S10. Evaluation of dye leakage in <b>NIR-HBT</b> stained HepG-2 cells                      | S5    |
| Figure S11-S16. $^1\text{H}$ NMR, $^{13}\text{C}$ NMR, HRMS.                                      | S6-S8 |

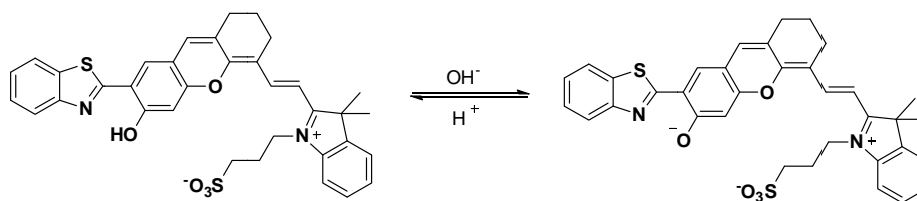

Scheme S1. Working principle of NIR-HBT.

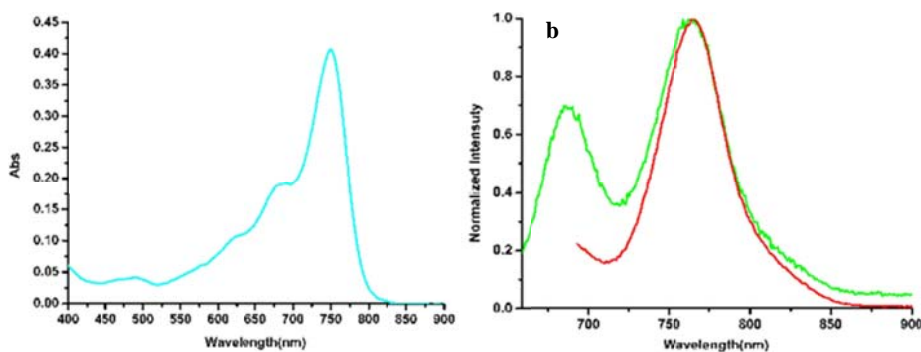

Figure S1 (a) Absorption spectra of NIR-HBT (5  $\mu$ M) in the PBS buffer (b) Fluorescence emission spectra of NIR-HBT (5  $\mu$ M) with an excitation at 683 nm (red line) and 638 nm (green line).

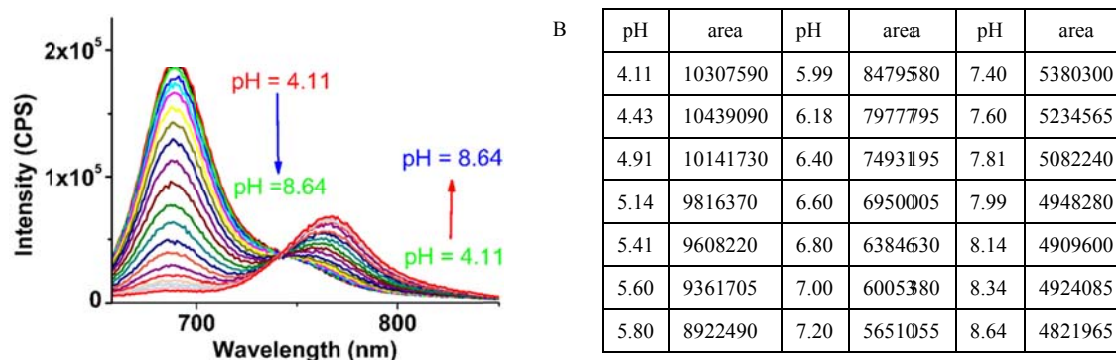

Figure S2 (A) Fluorescence emission spectra of 5  $\mu$ M NIR-HBT at different pH value (4.11, 4.43, 4.91, 5.14, 5.41, 5.60, 5.80, 5.99, 6.18, 6.40, 6.60, 6.80, 7.00, 7.20, 7.40, 7.60, 7.81, 7.99, 8.14, 8.34, 8.64). All samples were measured in 10 mM sodium phosphate buffer (0.01% Triton x 100) and 1% DMSO as a cosolvent, Ex = 638 nm. (B) The integral areas at different pH values.

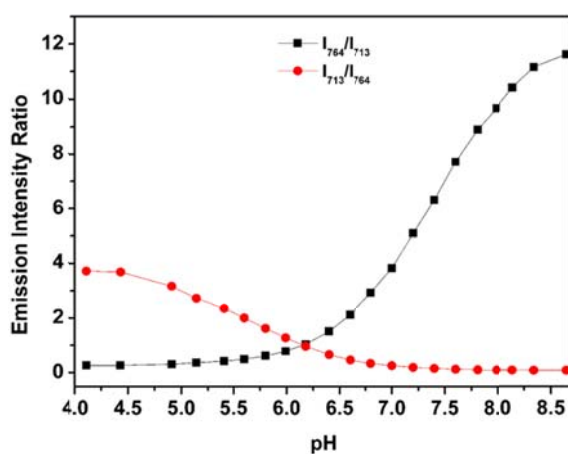

Figure S3 Plots of  $I_{764}/I_{713}$  (dark line) and  $I_{713}/I_{764}$  (red line) versus pH values in the range pH 4.11–8.64.

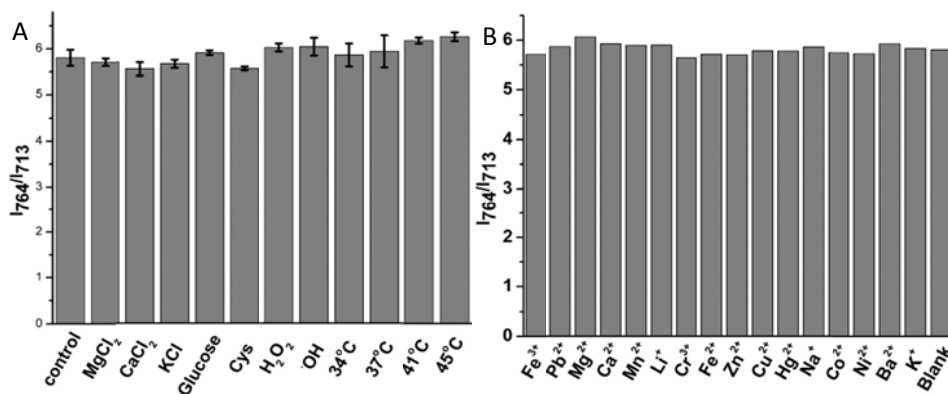

**Figure S4** (A) Fluorescence responses of NIR-HBT (5 μM) to various substances and temperature: MgCl<sub>2</sub> (1 mM), CaCl<sub>2</sub> (1 mM), KCl (150 mM), glucose (10 mM), cysteine (1 mM), H<sub>2</sub>O<sub>2</sub>(100 μM) and ·OH (100 μM). (B) Fluorescence responses of NIR-HBT (5 μM) to various cationic ions. The concentration of each ion is 50μM. All samples were measured in 10 mM sodium phosphate buffer (pH 7.4, 0.01% Triton x 100) and 1% DMSO as a cosolvent, Ex = 683 nm.

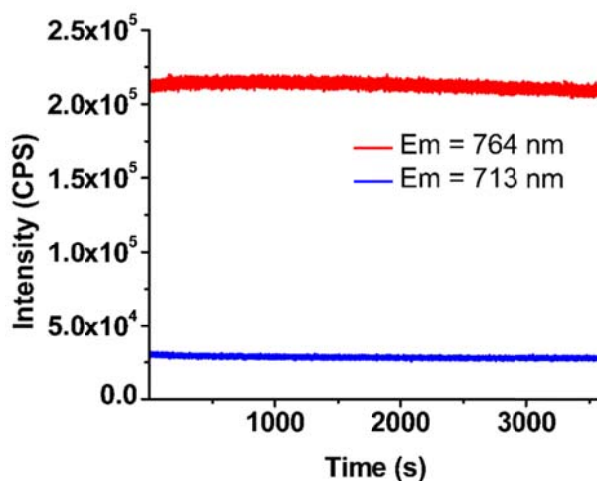

**Figure S5** Time-dependent fluorescence intensity change of NIR-HBT (5 μM) in 10 mM sodium phosphate buffer (pH 7.4, 0.01% Triton x 100) and 1% DMSO as a cosolvent. Ex = 683 nm

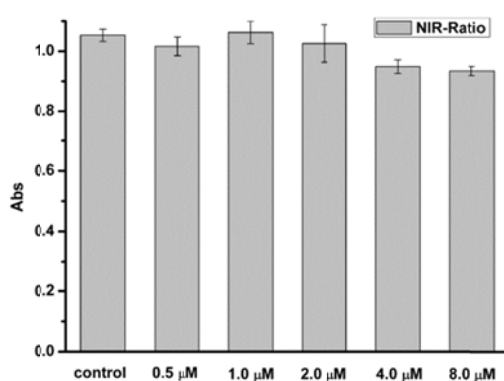

**Figure S6** Viability of HEPG 2 cells in the presence of NIR-HBT as measured by using CCK-8 assay. The cells were incubated with probe for 24 h

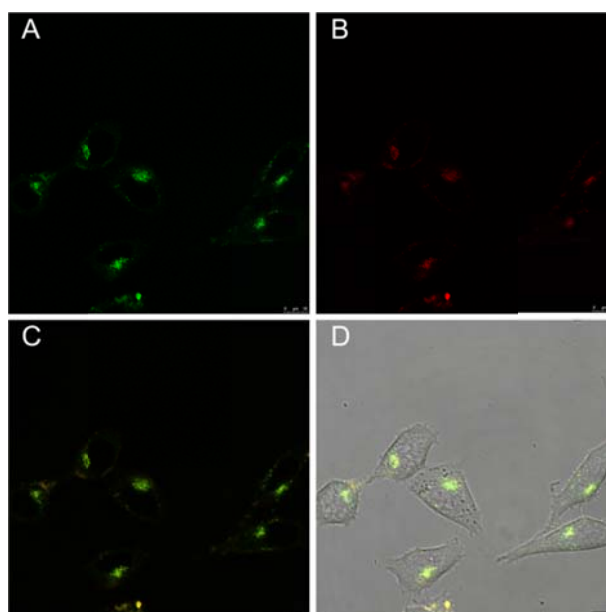

**Figure S7.** Confocal images of HEPG-2 cells incubated with NIR-HBT for 30 min under excitation at 638 nm (A) Green channel  $680 \pm 20$  nm and (B)  $750 \pm 30$  nm. (C) Image merged from those in panels A and B. (D) Image merged from that in panel C and the bright-field image. Scale bar: 10  $\mu$ m. [NIR-HBT] =  $5 \times 10^{-6}$  M.

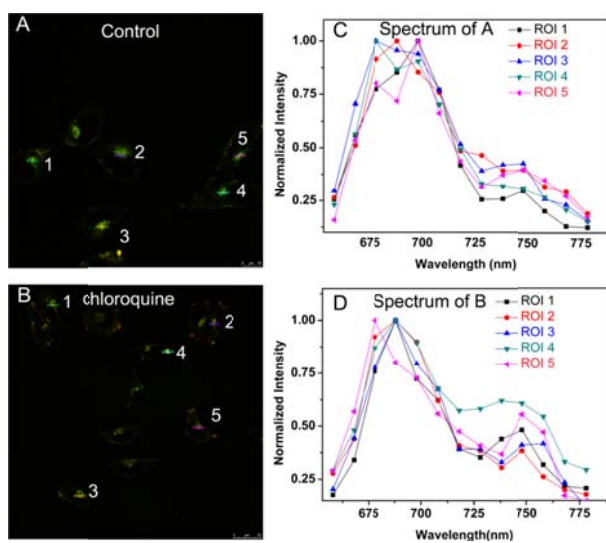

**Figure S8** (A) Fluorescence ratiometric images with NIR-HBT stained HepG-2 cells. (B) Fluorescence ratiometric images with 100  $\mu$ M chloroquine treated NIR-HBT stained HepG-2 cells. (C) and (D) The ROIs spectrum of NIR-HBT in A and B by scanning lambda ( $\lambda$ ) mode. Ex = 638 nm; Scanning range: 658 nm ~ 778 nm.

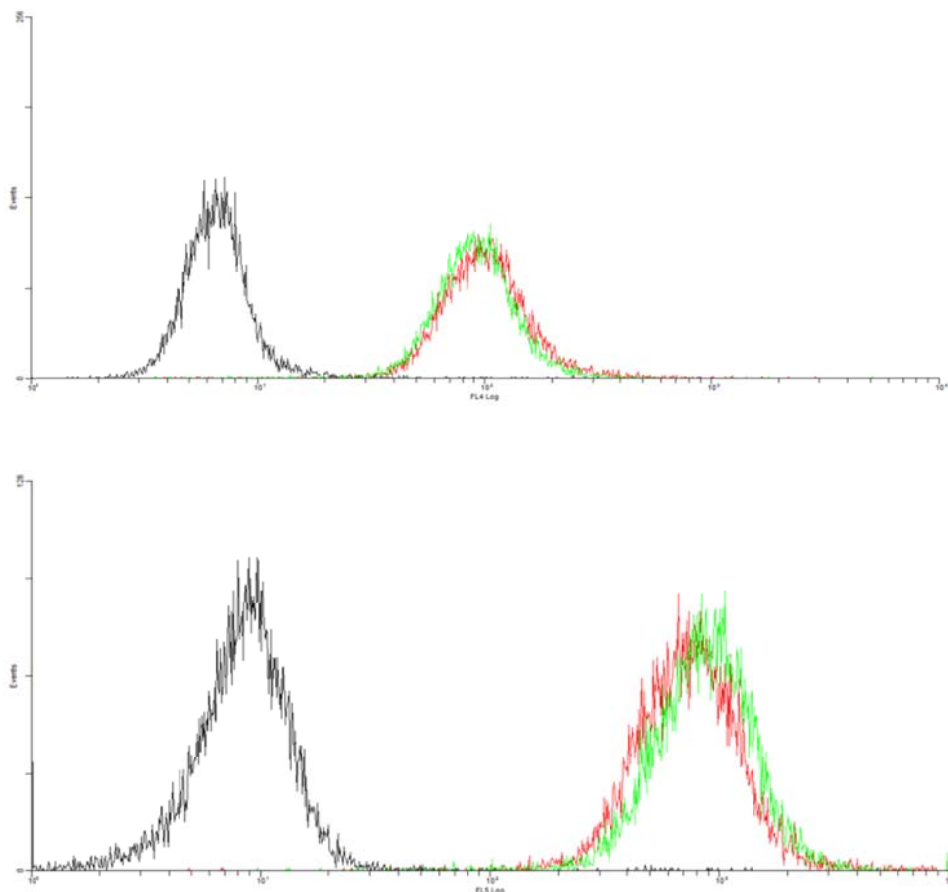

**Figure S9** Flow cytometry analysis of HepG-2 cells stained with NIR-HBT. The cells were in PBS (red line), treated with  $\text{NH}_4\text{Cl}$  (green line). The cells without staining are shown as control (black line). Up: Signal from the F4 channel (Em: 670 nm). Down: Signal from the F5 channel (Em: 770 nm).

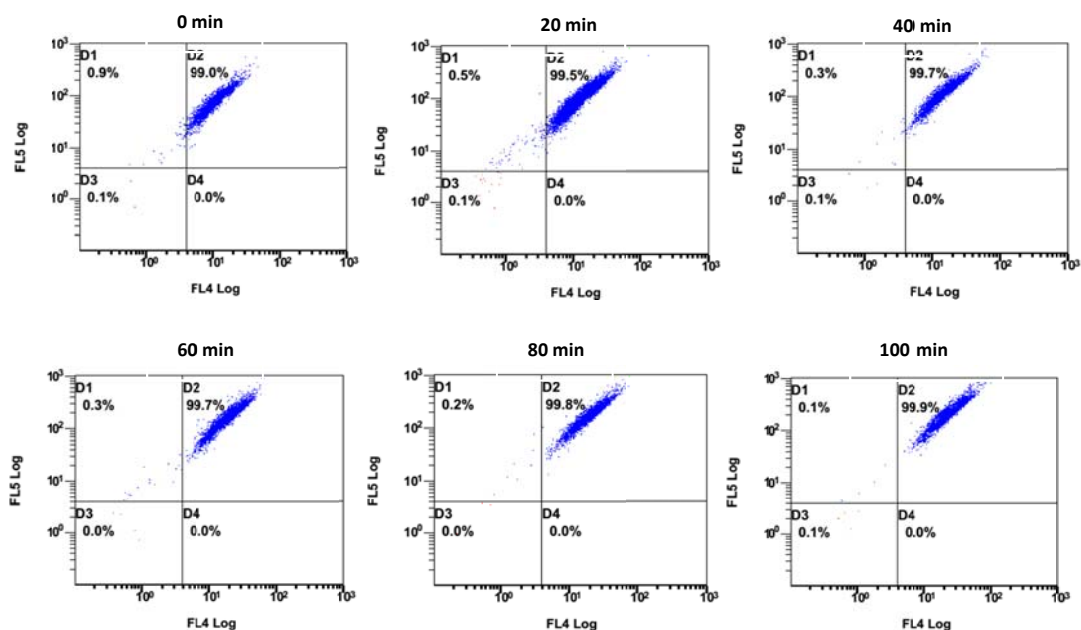

**Figure S10** Evaluation of dye leakage in NIR-HBT stained HepG2 cells at room temperature in 10 mM PBS buffer (pH 7.4). Data are collected by flow cytometer with the sampling of 10,000 cells in each event

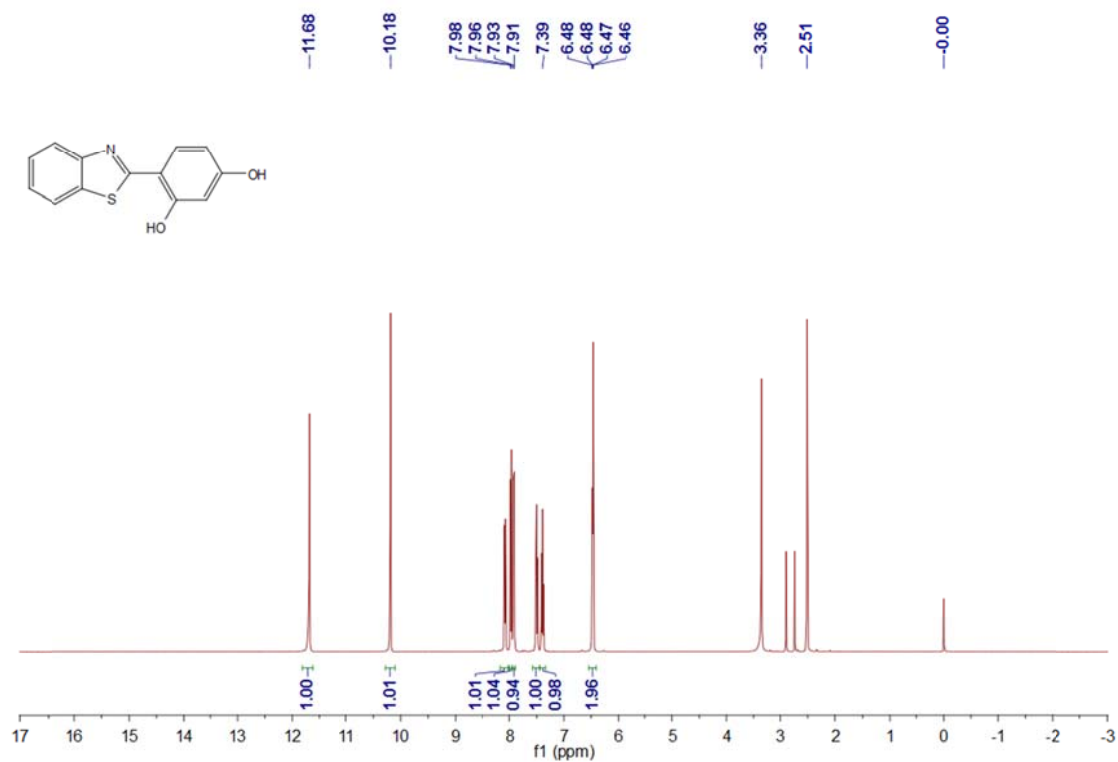

Figure S11 <sup>1</sup>H NMR spectrum of compound **8** in d<sup>6</sup>-DMSO

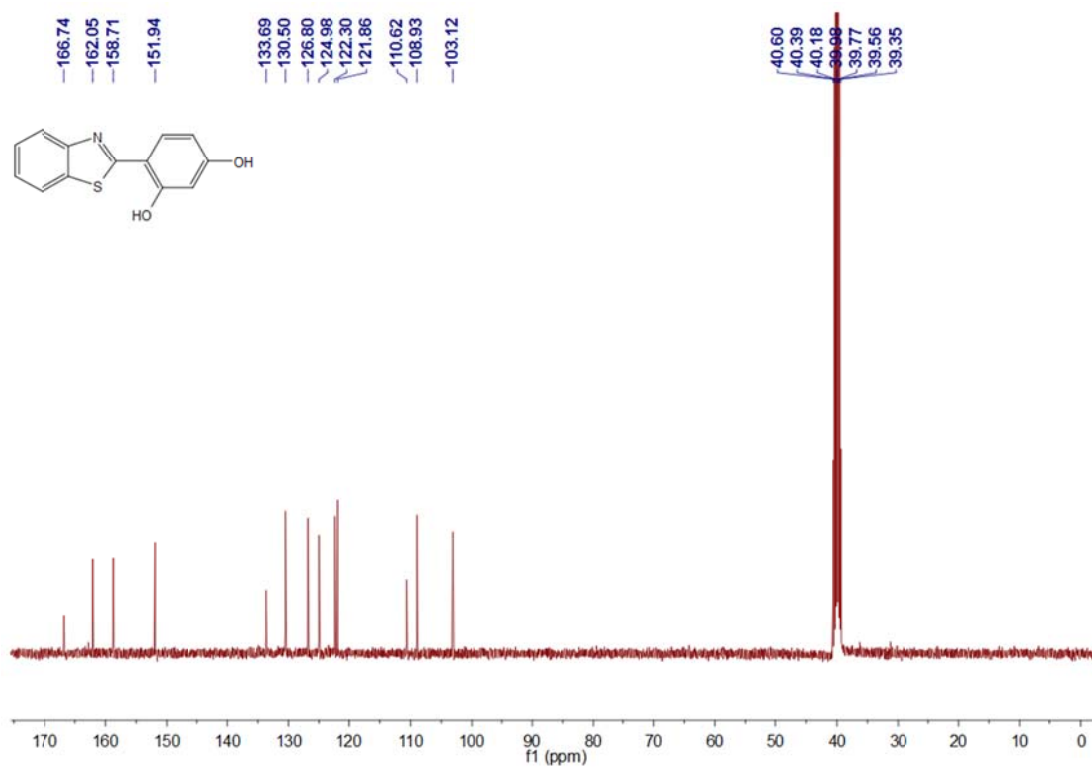

Figure S12 <sup>13</sup>C NMR spectrum of compound **8** in d<sup>6</sup>-DMSO

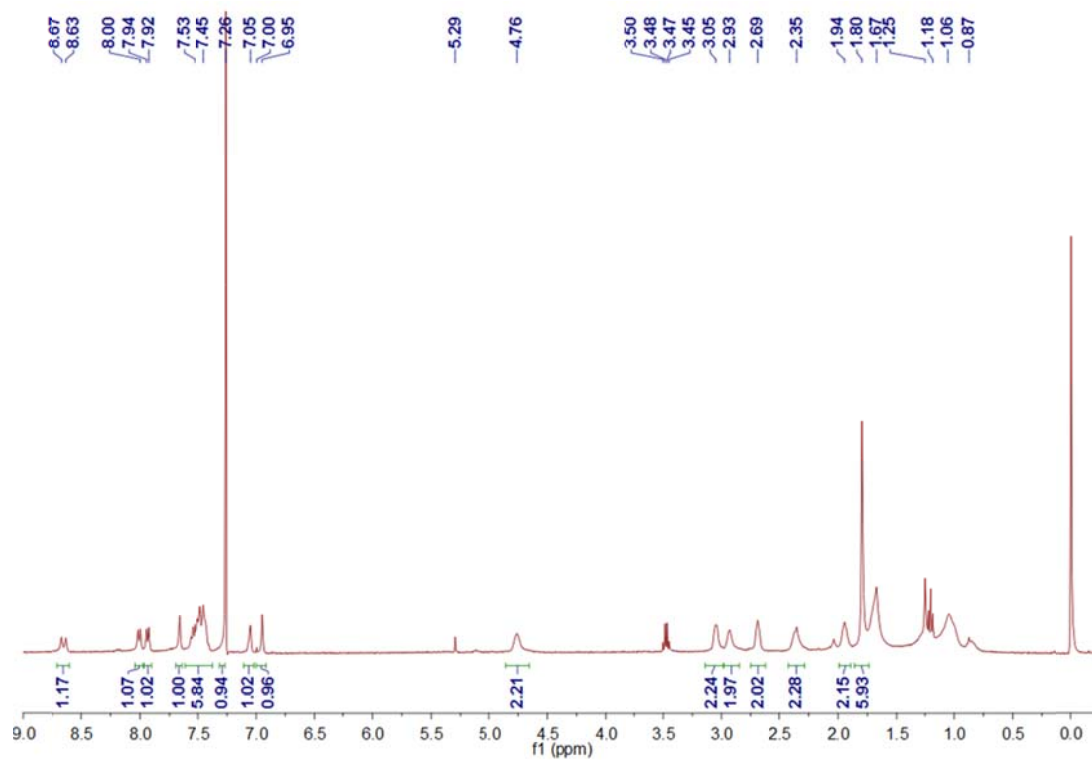

Figure S13  $^1\text{H}$ NMR spectrum of compound **NIR-HBT** in  $\text{CDCl}_3$

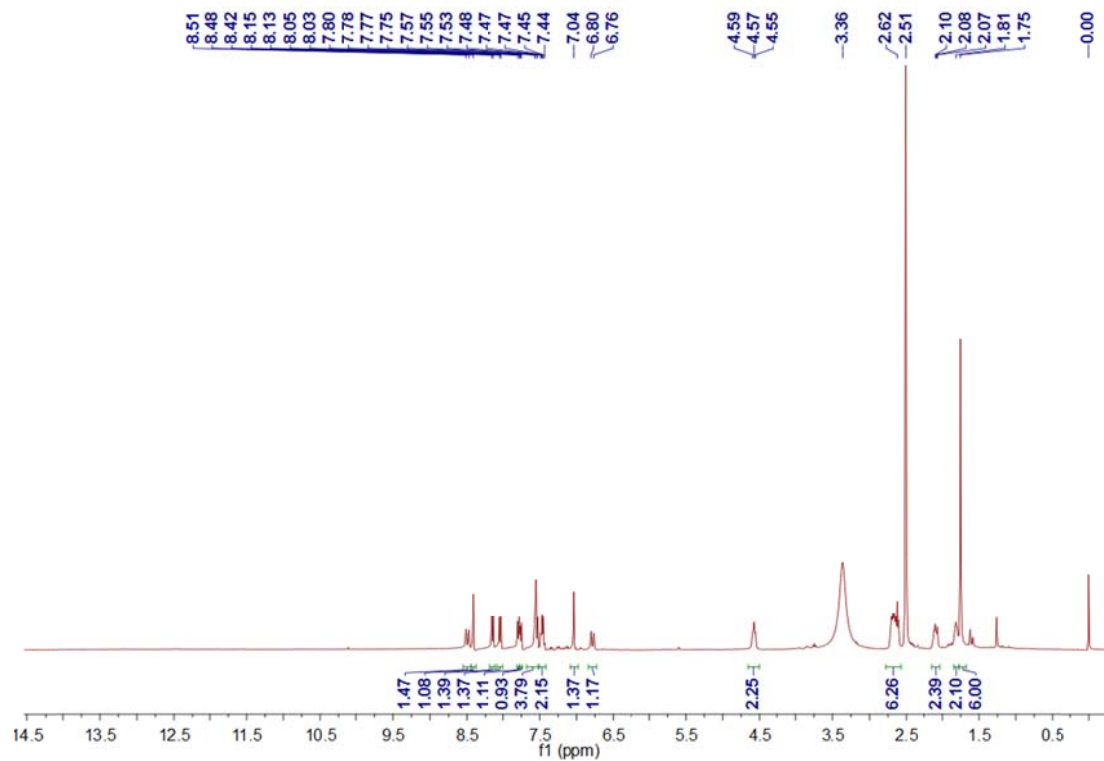

Figure S14  $^1\text{H}$ NMR spectrum of compound **NIR-HBT** in  $\text{d}^6\text{-DMSO}$

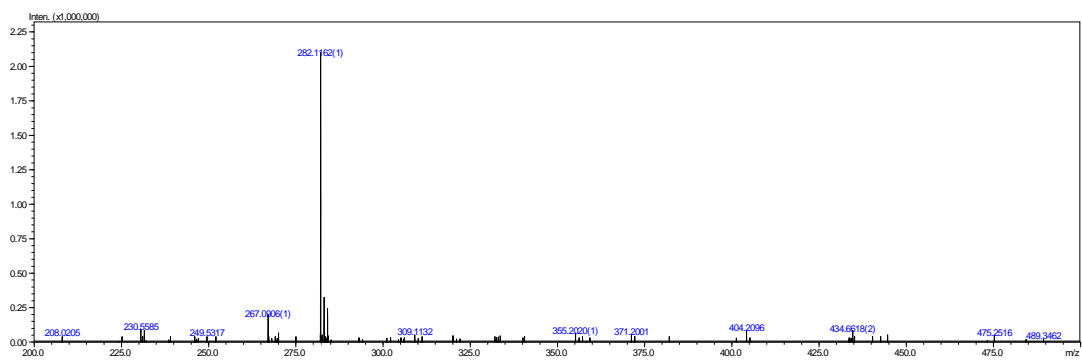

Figure S15 HRMS spectrum of compound 5

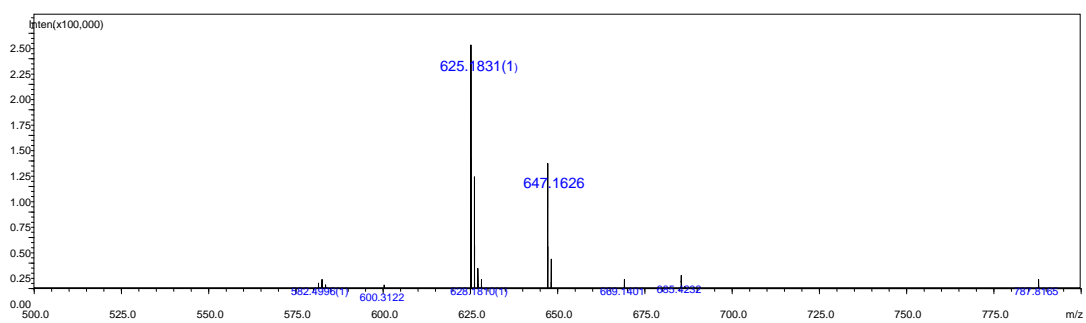

Figure S16 HRMS spectrum of NIR-HBT
